# Supplementary material for: A molecular precursor approach for the synthesis of composition-controlled ZnxCd1−xS and ZnxCd1−xSe nanoparticles
Source: Royal Society of Chemistry journal article supplement (doi:10.1039/b714745g), 2008-01-01
Supplement: b714745g.pdf [file b714745g.pdf]

Supplementary Material (ESI) for Journal of Materials Chemistry  
This journal is (c) The Royal Society of Chemistry 2008

## **SUPPORTING INFORMATION**

### **A Molecular Precursor Approach for the Synthesis of Composition-Controlled $\text{Zn}_x\text{Cd}_{1-x}\text{S}$ and $\text{Zn}_x\text{Cd}_{1-x}\text{Se}$ Nanoparticles**

**Marty W. DeGroot<sup>a</sup>, Katelyn M. Atkins<sup>a</sup>, Aneta Borecki<sup>a</sup>, Harald Rösner<sup>b</sup> and John F.  
Corrigan<sup>a\*</sup>**

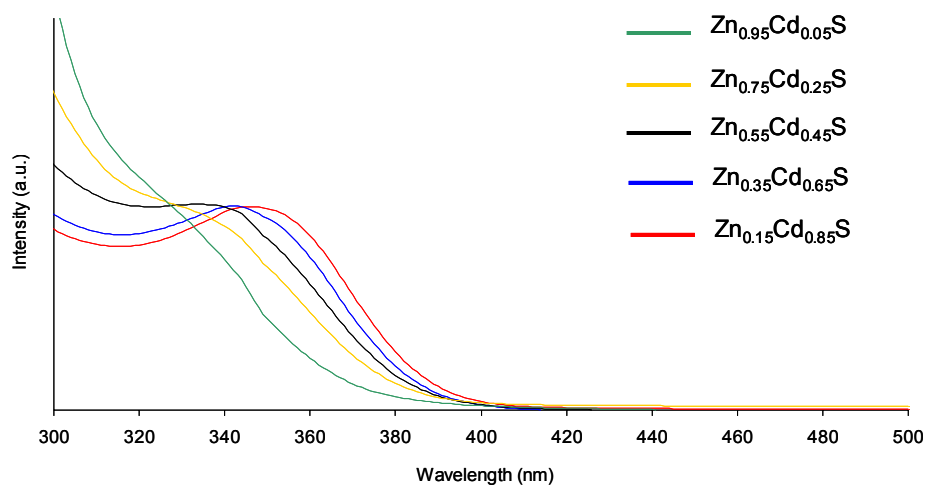

Solution (DMF) absorption spectra of Zn<sub>x</sub>Cd<sub>1-x</sub>S nanoparticles for x = 0.95, 0.75, 0.55, 0.35 and 0.15.

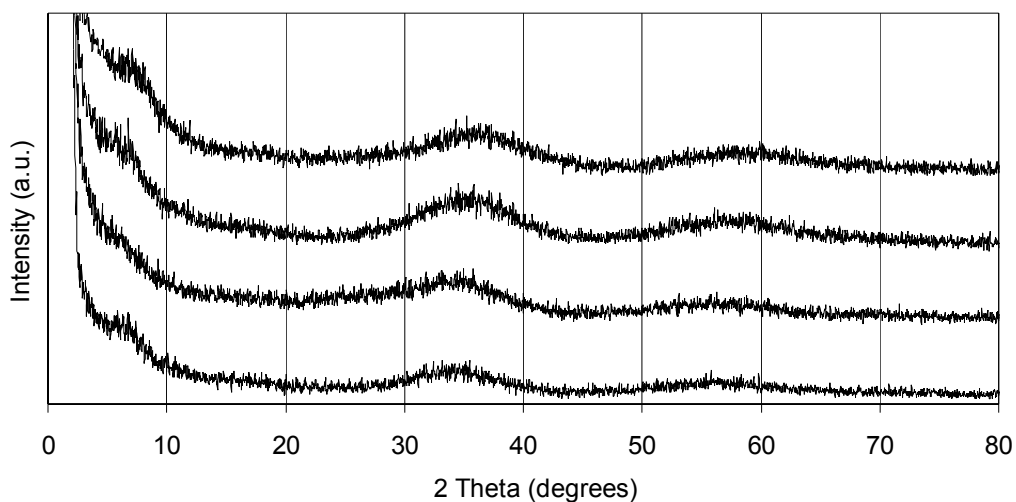

Powder X-ray diffraction patterns of the as-prepared Zn<sub>x</sub>Cd<sub>1-x</sub>S nanoparticles. From top to bottom: Zn<sub>0.95</sub>Cd<sub>0.05</sub>S, Zn<sub>0.65</sub>Cd<sub>0.35</sub>S, Zn<sub>0.35</sub>Cd<sub>0.65</sub>S and Zn<sub>0.05</sub>Cd<sub>0.95</sub>S.

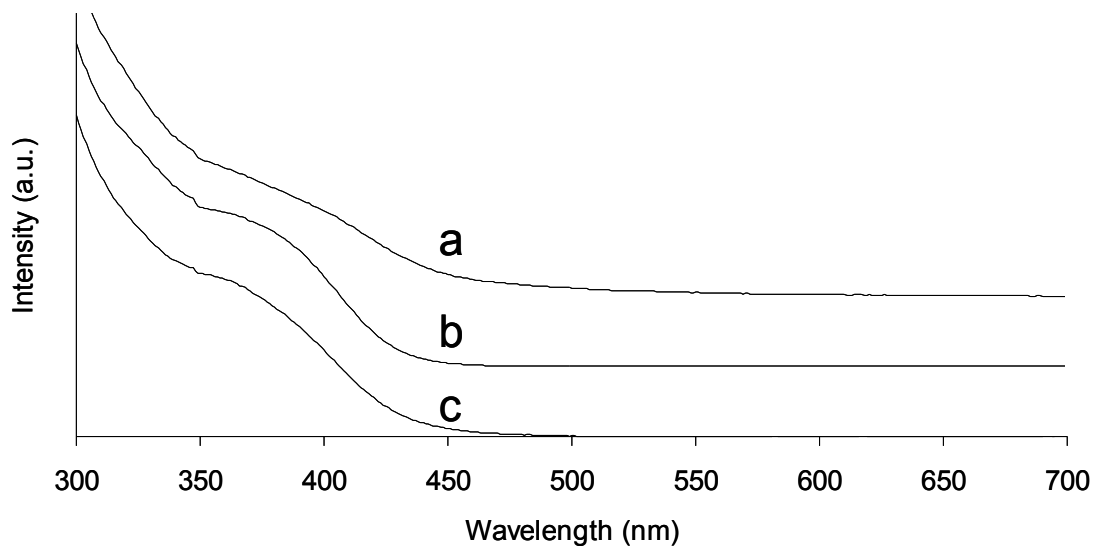

UV-visible spectrum of Zn<sub>0.25</sub>Cd<sub>0.75</sub>Se nanoparticles prepared in THF with reaction temperatures of a) 66°C, b) 0°C and c) -78°C
